# Supplementary material for: Takotsubo Syndrome during COVID-19 Pandemic in the Veneto Region, Italy
Source: MDPI journal article supplement (doi:10.3390/v14091971), 2022-09-06
Supplement: s1 [file s1]

**Supplementary Table S1.** Characteristics of the recruiting Hospitals.

| <b>Hospital</b>    | <b>Type</b> | <b>Beds in Cardiology ward</b> | <b>Beds in ICCU</b> | <b>Beds converted for COVID-19 patients</b> |
|--------------------|-------------|--------------------------------|---------------------|---------------------------------------------|
| Arzignano          | Spoke       | 14                             | 4                   | 0                                           |
| Mirano             | Hub         | 32                             | 8                   | 0                                           |
| Legnago            | Hub         | 29                             | 8                   | 0                                           |
| Padova             | Hub         | 44                             | 16                  | 0                                           |
| Rovigo             | Hub         | 24                             | 9                   | 1                                           |
| Mestre             | Hub         | 29                             | 8                   | 0                                           |
| San Bonifacio      | Spoke       | 12                             | 4                   | 0                                           |
| San Donà di Piave  | Hub         | 22                             | 8                   | 0                                           |
| Negrar             | Hub         | 17                             | 4                   | 0                                           |
| Bassano del Grappa | Hub         | 20                             | 14                  | 0                                           |
| Venezia            | Hub         | 18                             | 7                   | 0                                           |
| Verona             | Hub         | 44                             | 8                   | 0                                           |
| Chioggia           | Spoke       | 6                              | 4                   | 0                                           |
